# Supplementary figures and images for: Novel Pd(ii)–salen complexes showing high in vitro anti-proliferative effects against human hepatoma cancer by modulating specific regulatory genes
Source: Royal Society of Chemistry journal article supplement (doi:10.1039/c2dt31143g), 2012-01-01

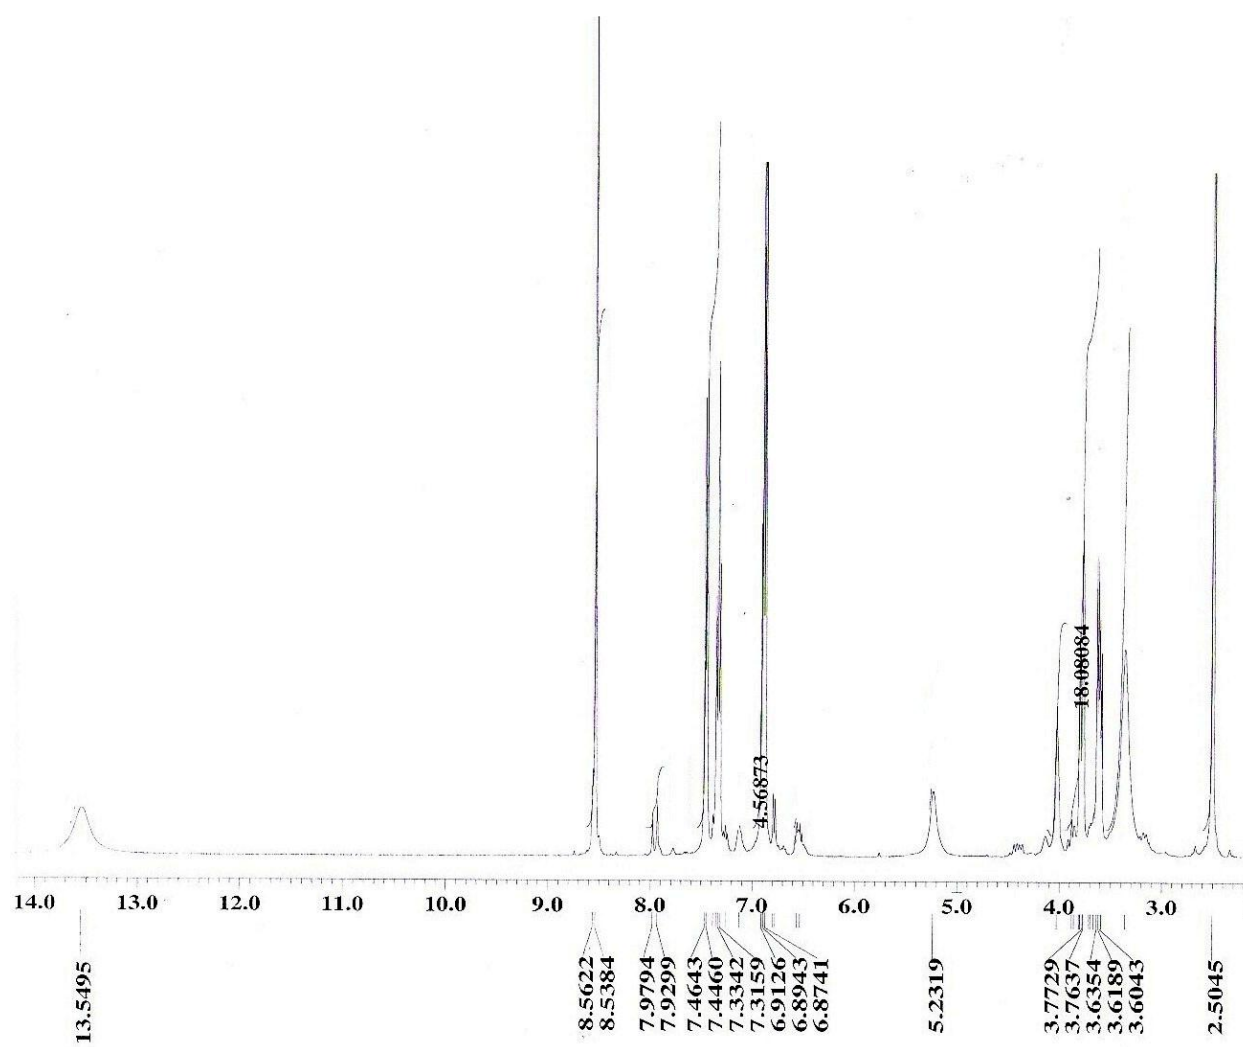

Fig 1 S:  $^1\text{H}$ NMR Spectrum of Complex 2

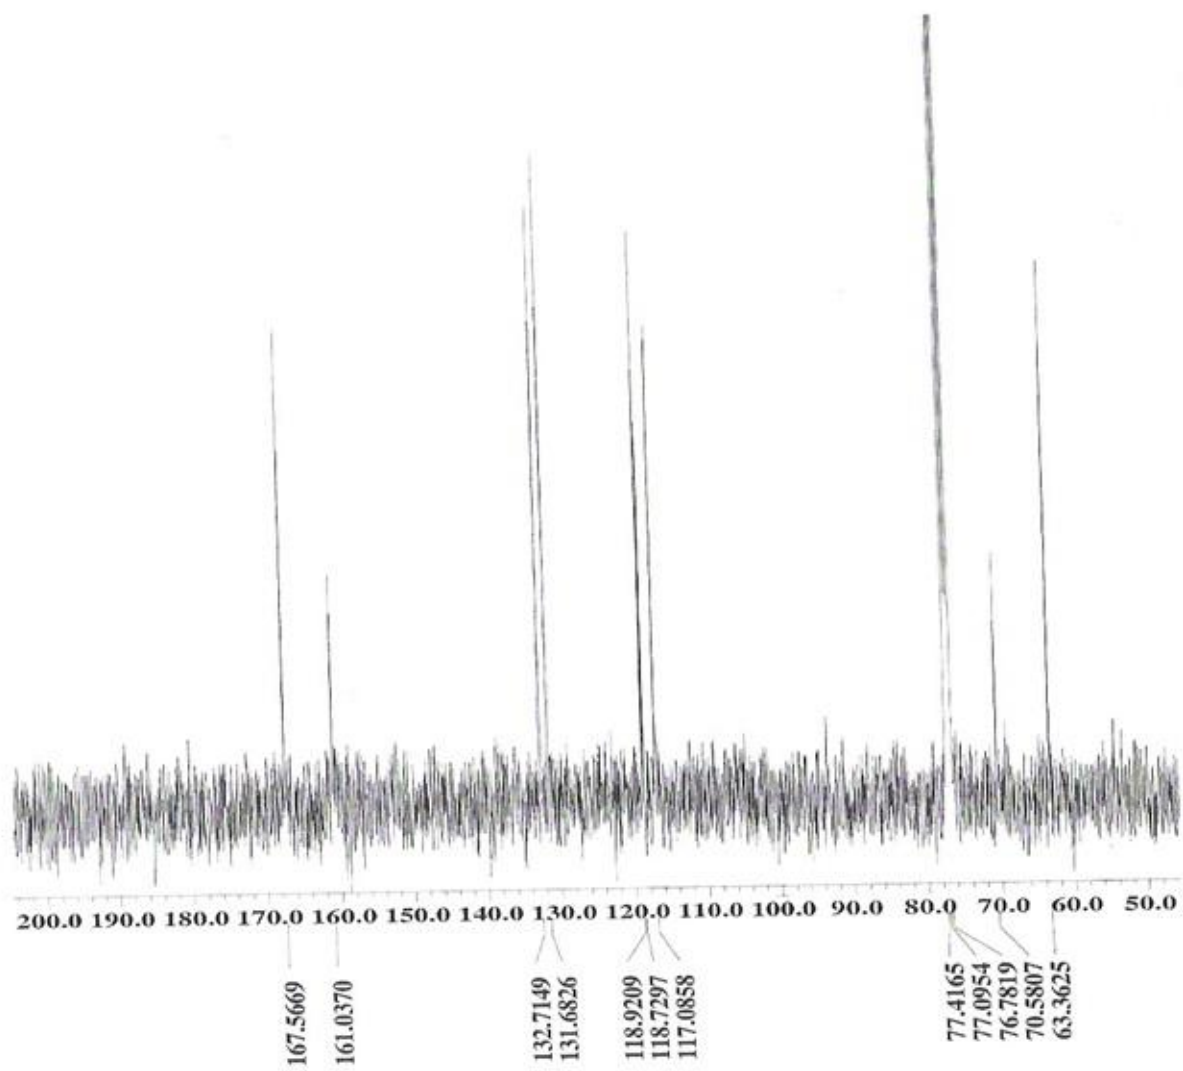

Fig 2S:  $^{13}\text{C}$ NMR Spectrum of complex 1

Supplement: c2dt31143g.pdf [file c2dt31143g.pdf]
